# Supplementary material for: Functional diversity of family 3 β-glucosidases from thermophilic cellulolytic fungus Humicola insolens Y1
Source: PubMed Central journal article supplement (PMC4897640; doi:10.1038/srep27062), 2016-06-08

**Functional diversity of family 3  $\beta$ -glucosidases from thermophilic cellulolytic fungus *Humicola insolens* Y1**

Wei Xia<sup>1,2\*</sup>, Yingguo Bai<sup>2\*</sup>, Ying Cui<sup>2</sup>, Xinxin Xu<sup>3</sup>, Lichun Qian<sup>1</sup>, Pengjun Shi<sup>2</sup>, Wei Zhang<sup>3</sup>, Huiying Luo<sup>2</sup>, Xiuan Zhan<sup>1</sup> & Bin Yao<sup>2</sup>

<sup>1</sup> College of Animal Science, Zhejiang University, Hangzhou 310058, People's Republic of China. <sup>2</sup> Key Laboratory for Feed Biotechnology of the Ministry of Agriculture, Feed Research Institute, Chinese Academy of Agricultural Sciences, Beijing 100081, People's Republic of China. <sup>3</sup> Biotechnology Research Institute, Chinese Academy of Agricultural Sciences, Beijing 100081, People's Republic of China. Correspondence and requests for materials should be addressed to L.Q. (email: lcqian@zju.edu.cn) or B.Y. (email: binyao@caas.cn)

\*These authors contributed equally to this work.

**Supplementary Table S1.** Effect of metal ions and chemical reagents (5 mM) on the activity of purified recombinant  $\beta$ -glucosidases from *H. insolens* Y1

| Chemicals                | Relative activity (%) <sup>a</sup> |                 |                 |
|--------------------------|------------------------------------|-----------------|-----------------|
|                          | HiBgl3A                            | HiBgl3B         | HiBgl3C         |
| None                     | 100.0 $\pm$ 2.1                    | 100.0 $\pm$ 2.4 | 100.0 $\pm$ 1.4 |
| Mn <sup>2+</sup>         | 127.5 $\pm$ 16                     | 116.8 $\pm$ 2.8 | 123.6 $\pm$ 6.6 |
| Mg <sup>2+</sup>         | 110.9 $\pm$ 2.8                    | 77.1 $\pm$ 1.2  | 102.8 $\pm$ 5.4 |
| Zn <sup>2+</sup>         | 110.6 $\pm$ 2.8                    | 89.9 $\pm$ 1.9  | 102.1 $\pm$ 1.0 |
| Ca <sup>2+</sup>         | 108.4 $\pm$ 3.9                    | 98.5 $\pm$ 1.5  | 102.3 $\pm$ 2.6 |
| Cu <sup>2+</sup>         | 106.4 $\pm$ 2.8                    | 83.8 $\pm$ 2.9  | 101.5 $\pm$ 4.6 |
| Co <sup>2+</sup>         | 105.6 $\pm$ 2.8                    | 90.2 $\pm$ 6.1  | 103.3 $\pm$ 3.2 |
| Cr <sup>3+</sup>         | 104.5 $\pm$ 2.6                    | 70.2 $\pm$ 4.5  | 106.9 $\pm$ 3.9 |
| Ni <sup>2+</sup>         | 102.1 $\pm$ 1.5                    | 89.7 $\pm$ 2.2  | 102.8 $\pm$ 4.8 |
| Pb <sup>2+</sup>         | 100.2 $\pm$ 5.3                    | 85.8 $\pm$ 2.9  | 103.9 $\pm$ 7.9 |
| Fe <sup>3+</sup>         | 95.3 $\pm$ 1.7                     | 93.3 $\pm$ 2.7  | 93.8 $\pm$ 9.4  |
| Ag <sup>+</sup>          | 28.0 $\pm$ 4.3                     | 24.0 $\pm$ 4.9  | 10.6 $\pm$ 5.2  |
| EDTA                     | 103.1 $\pm$ 1.7                    | 90.7 $\pm$ 2.0  | 101.1 $\pm$ 2.3 |
| $\beta$ -Mercaptoethanol | 77.7 $\pm$ 1.1                     | 97.4 $\pm$ 6.6  | 108.5 $\pm$ 5.1 |
| SDS                      | 45.3 $\pm$ 2.3                     | 4.9 $\pm$ 1.2   | 37.8 $\pm$ 1.8  |

<sup>a</sup> Values represent the mean  $\pm$  SD (n = 3) relative to the untreated control samples

**Supplementary Table S2.** Primers used in this study.

| Primer name      | Primer sequence (5'→3') <sup>a</sup>                |
|------------------|-----------------------------------------------------|
| <i>HiBgl3A-F</i> | GGG <u>ACTAGT</u> AACAGGCATCGCCAGGTTATCGGCAGG       |
| <i>HiBgl3A-R</i> | GGGG <u>CGGCCG</u> CTCACGGAAGCTCAGCGCTCAACTCCAATTTC |
| <i>HiBgl3B-F</i> | GGG <u>GAATTC</u> CGCGTTGTCGAGCCCCGCGATC            |
| <i>HiBgl3B-R</i> | GGGG <u>CGGCCG</u> CTCAAACCGGCTGCTTCGCCCCCTC        |
| <i>HiBgl3C-F</i> | GGG <u>ACTAGT</u> ATGGGTATCTTCGGTCTCGC              |
| <i>HiBgl3C-R</i> | GGGG <u>CGGCCG</u> CTCAAACATCAATGCTGCCCGTC          |
| W69I-F           | ACCCGAAGGCTGCAGAG <u>ATTC</u> AGAATGCCTACGCCAA      |
| W69I-R           | TTGGCGTAGGCATTCTG <u>AAT</u> CTCTGCAGCCTTCGGGT      |
| F304I-F          | ATGCCCGGAGATAACCACG <u>ATTA</u> AACTGGTGTTCAGTTTC   |
| F304I-R          | GAAACTGACACCAGTGTT <u>AAT</u> CGTGGTATCTCCGGGCAT    |
| Y509T-F          | GCGAACTCGGGTGAGGGG <u>ACGACA</u> AAGGGTTGACGGCAAT   |
| Y509T-R          | ATTGCCGTCAACCCTTGTC <u>CGT</u> CCCCTCACCCGAGTTCGC   |
| I48W-F           | TCACATCGGGCGTTGGCT <u>TGGT</u> TATATGGGACCCTGTGT    |
| I48W-R           | ACACAGGGTCCCATATA <u>CCAG</u> CCAACGCCCGATGTGA      |
| I278F-F          | ATGCCGGGCGATACAAAC <u>TTT</u> CCCTTGTTTGGTAACAGT    |
| I278F-R          | ACTGTTACCAAACAAGGG <u>AAA</u> GTTTGTATCGCCCGGCAT    |
| T484Y-F          | TCCGACTCGGGAGAGA <u>ATTAC</u> CTGACAGTCGAGGGCAAC    |
| T484Y-R          | GTTGCCCTCGACTGTCAGG <u>TAA</u> TTCTCTCCCGAGTCGGA    |

<sup>a</sup> The restriction sites are shown underlined; the mutation sites are colored gray.

**Supplementary Figure S1. SDS-PAGE analysis of the recombinant  $\beta$ -glucosidases.**

Lanes: M, the standard protein molecular weight markers; A1, B1 and C1, the purified *HiBgl3A*, *HiBgl3B* and *HiBgl3C*, respectively; A2, B2 and C2, the purified *HiBgl3A*, *HiBgl3B* and *HiBgl3C* after deglycosylation with Endo H.

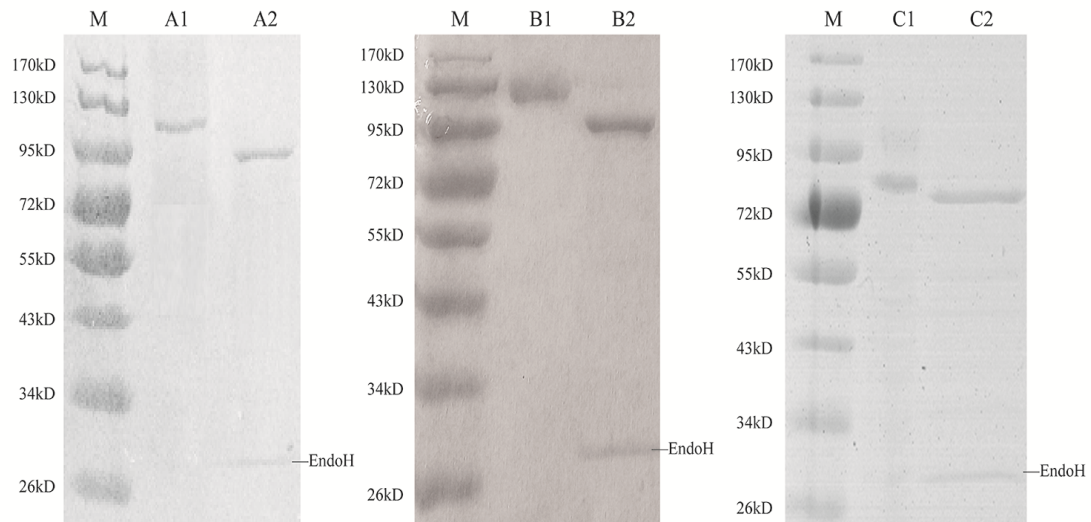

**Supplementary Figure S2. The three conserved residues related to substrate recognition (shown in stick and labeled) in GH3  $\beta$ -glucosidases. A, AaBgl1 from *Aspergillus aculeatus* (PDB: 4IIB); B, Cel3A from *Hypocrea jecorina*; C, HiBgl3A ; D, HiBgl3B; E, HiBgl3C.**

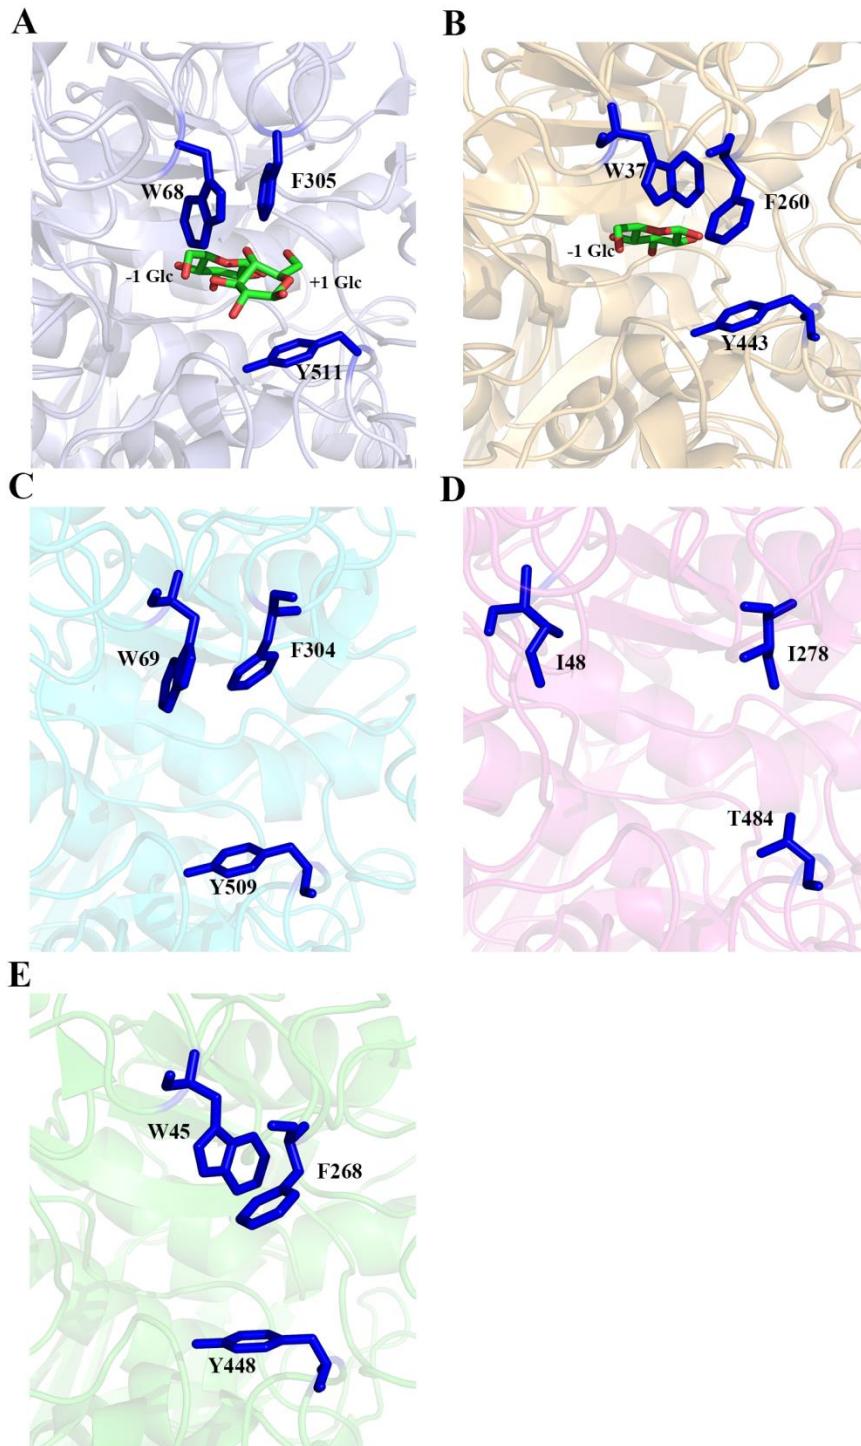

Supplement: srep27062-s1.pdf [file srep27062-s1.pdf]
